# Supplementary material
Source: PubMed Central journal article supplement (PMC1242271)
Supplement: plntcell_tpc.105.035048_1.pdf [file plntcell_tpc.105.035048_1.pdf]

## Supplemental Figure 1

|                                                                                                                                                                                                                                                                                                                                                                                                                                                                                                                                                                                                                                                                                                                                                                                                                                                                                                                                                                                                                                                                                                                                                                                                                                                                                                                                                                                                                                                                                                                                                                                                                                                                                                                                                                                                                                                                                                                                                                                                                                                                                                                                                                                                                                                                                                                                                                                                                                                                                                                                                                                                                                                                                                                                                                                                                                                                                                                                                                                                                                                                                                                                                                                                                                                                                                                                                                                                                                                                                                                                                                                                                                                                                                                                   |     |                                                                                                           |     |                                                        |     |     |     |     |                               |     |                    |     |                                                    |                                         |     |                      |     |                                                     |                                         |     |                      |     |                                                     |                                        |     |                     |     |                                                       |                             |     |                     |     |                                                       |                          |     |                     |     |                                                        |                                      |     |                     |     |                                                        |                                     |     |                     |     |                                                        |                                    |     |                     |     |                                                       |                                        |     |                     |     |                                                      |                                         |     |                     |     |                                                       |                                          |     |                     |     |                                                        |                                       |     |                     |     |                                                       |                          |     |                    |     |                                                       |                          |     |                     |     |                                                       |                                |     |                     |     |                                                       |                                  |     |                     |     |                                                      |                             |     |                     |     |                                                       |                               |     |                     |     |                                                       |
|-----------------------------------------------------------------------------------------------------------------------------------------------------------------------------------------------------------------------------------------------------------------------------------------------------------------------------------------------------------------------------------------------------------------------------------------------------------------------------------------------------------------------------------------------------------------------------------------------------------------------------------------------------------------------------------------------------------------------------------------------------------------------------------------------------------------------------------------------------------------------------------------------------------------------------------------------------------------------------------------------------------------------------------------------------------------------------------------------------------------------------------------------------------------------------------------------------------------------------------------------------------------------------------------------------------------------------------------------------------------------------------------------------------------------------------------------------------------------------------------------------------------------------------------------------------------------------------------------------------------------------------------------------------------------------------------------------------------------------------------------------------------------------------------------------------------------------------------------------------------------------------------------------------------------------------------------------------------------------------------------------------------------------------------------------------------------------------------------------------------------------------------------------------------------------------------------------------------------------------------------------------------------------------------------------------------------------------------------------------------------------------------------------------------------------------------------------------------------------------------------------------------------------------------------------------------------------------------------------------------------------------------------------------------------------------------------------------------------------------------------------------------------------------------------------------------------------------------------------------------------------------------------------------------------------------------------------------------------------------------------------------------------------------------------------------------------------------------------------------------------------------------------------------------------------------------------------------------------------------------------------------------------------------------------------------------------------------------------------------------------------------------------------------------------------------------------------------------------------------------------------------------------------------------------------------------------------------------------------------------------------------------------------------------------------------------------------------------------------------|-----|-----------------------------------------------------------------------------------------------------------|-----|--------------------------------------------------------|-----|-----|-----|-----|-------------------------------|-----|--------------------|-----|----------------------------------------------------|-----------------------------------------|-----|----------------------|-----|-----------------------------------------------------|-----------------------------------------|-----|----------------------|-----|-----------------------------------------------------|----------------------------------------|-----|---------------------|-----|-------------------------------------------------------|-----------------------------|-----|---------------------|-----|-------------------------------------------------------|--------------------------|-----|---------------------|-----|--------------------------------------------------------|--------------------------------------|-----|---------------------|-----|--------------------------------------------------------|-------------------------------------|-----|---------------------|-----|--------------------------------------------------------|------------------------------------|-----|---------------------|-----|-------------------------------------------------------|----------------------------------------|-----|---------------------|-----|------------------------------------------------------|-----------------------------------------|-----|---------------------|-----|-------------------------------------------------------|------------------------------------------|-----|---------------------|-----|--------------------------------------------------------|---------------------------------------|-----|---------------------|-----|-------------------------------------------------------|--------------------------|-----|--------------------|-----|-------------------------------------------------------|--------------------------|-----|---------------------|-----|-------------------------------------------------------|--------------------------------|-----|---------------------|-----|-------------------------------------------------------|----------------------------------|-----|---------------------|-----|------------------------------------------------------|-----------------------------|-----|---------------------|-----|-------------------------------------------------------|-------------------------------|-----|---------------------|-----|-------------------------------------------------------|
|                                                                                                                                                                                                                                                                                                                                                                                                                                                                                                                                                                                                                                                                                                                                                                                                                                                                                                                                                                                                                                                                                                                                                                                                                                                                                                                                                                                                                                                                                                                                                                                                                                                                                                                                                                                                                                                                                                                                                                                                                                                                                                                                                                                                                                                                                                                                                                                                                                                                                                                                                                                                                                                                                                                                                                                                                                                                                                                                                                                                                                                                                                                                                                                                                                                                                                                                                                                                                                                                                                                                                                                                                                                                                                                                   | 3   |                                                                                                           | 98  |                                                        |     |     |     |     |                               |     |                    |     |                                                    |                                         |     |                      |     |                                                     |                                         |     |                      |     |                                                     |                                        |     |                     |     |                                                       |                             |     |                     |     |                                                       |                          |     |                     |     |                                                        |                                      |     |                     |     |                                                        |                                     |     |                     |     |                                                        |                                    |     |                     |     |                                                       |                                        |     |                     |     |                                                      |                                         |     |                     |     |                                                       |                                          |     |                     |     |                                                        |                                       |     |                     |     |                                                       |                          |     |                    |     |                                                       |                          |     |                     |     |                                                       |                                |     |                     |     |                                                       |                                  |     |                     |     |                                                      |                             |     |                     |     |                                                       |                               |     |                     |     |                                                       |
| <i>Synechocystis</i> PCC 6803                                                                                                                                                                                                                                                                                                                                                                                                                                                                                                                                                                                                                                                                                                                                                                                                                                                                                                                                                                                                                                                                                                                                                                                                                                                                                                                                                                                                                                                                                                                                                                                                                                                                                                                                                                                                                                                                                                                                                                                                                                                                                                                                                                                                                                                                                                                                                                                                                                                                                                                                                                                                                                                                                                                                                                                                                                                                                                                                                                                                                                                                                                                                                                                                                                                                                                                                                                                                                                                                                                                                                                                                                                                                                                     | ... | KIRTVSDAKRKFTHYSRPISSIIYRRFVEELLVEMHLLSVNIDFTYDPIFALGIVTSFNSFMQGYQPAEQLPFAIFNALCHGVDQNPQVQRQDAKNV...      |     |                                                        |     |     |     |     |                               |     |                    |     |                                                    |                                         |     |                      |     |                                                     |                                         |     |                      |     |                                                     |                                        |     |                     |     |                                                       |                             |     |                     |     |                                                       |                          |     |                     |     |                                                        |                                      |     |                     |     |                                                        |                                     |     |                     |     |                                                        |                                    |     |                     |     |                                                       |                                        |     |                     |     |                                                      |                                         |     |                     |     |                                                       |                                          |     |                     |     |                                                        |                                       |     |                     |     |                                                       |                          |     |                    |     |                                                       |                          |     |                     |     |                                                       |                                |     |                     |     |                                                       |                                  |     |                     |     |                                                      |                             |     |                     |     |                                                       |                               |     |                     |     |                                                       |
| <i>Prochlorococcus marinus</i> CCMP1375                                                                                                                                                                                                                                                                                                                                                                                                                                                                                                                                                                                                                                                                                                                                                                                                                                                                                                                                                                                                                                                                                                                                                                                                                                                                                                                                                                                                                                                                                                                                                                                                                                                                                                                                                                                                                                                                                                                                                                                                                                                                                                                                                                                                                                                                                                                                                                                                                                                                                                                                                                                                                                                                                                                                                                                                                                                                                                                                                                                                                                                                                                                                                                                                                                                                                                                                                                                                                                                                                                                                                                                                                                                                                           | ... | EQTTSIDSKGLFHKEFPYVIPVYRKRVLDEYLVELNLLSNQSNFKIDTIFSYGLIISFERFTVGYEPDSHISKILESLCNSCNIDKAIKEYSNNI...        |     |                                                        |     |     |     |     |                               |     |                    |     |                                                    |                                         |     |                      |     |                                                     |                                         |     |                      |     |                                                     |                                        |     |                     |     |                                                       |                             |     |                     |     |                                                       |                          |     |                     |     |                                                        |                                      |     |                     |     |                                                        |                                     |     |                     |     |                                                        |                                    |     |                     |     |                                                       |                                        |     |                     |     |                                                      |                                         |     |                     |     |                                                       |                                          |     |                     |     |                                                        |                                       |     |                     |     |                                                       |                          |     |                    |     |                                                       |                          |     |                     |     |                                                       |                                |     |                     |     |                                                       |                                  |     |                     |     |                                                      |                             |     |                     |     |                                                       |                               |     |                     |     |                                                       |
| <i>Prochlorococcus marinus</i> CCMP1986                                                                                                                                                                                                                                                                                                                                                                                                                                                                                                                                                                                                                                                                                                                                                                                                                                                                                                                                                                                                                                                                                                                                                                                                                                                                                                                                                                                                                                                                                                                                                                                                                                                                                                                                                                                                                                                                                                                                                                                                                                                                                                                                                                                                                                                                                                                                                                                                                                                                                                                                                                                                                                                                                                                                                                                                                                                                                                                                                                                                                                                                                                                                                                                                                                                                                                                                                                                                                                                                                                                                                                                                                                                                                           | ... | EKLTVSDSKLFLHEQFPYVIPGLYKRIVDEMLVELNLLNHQNEFIQDDLFCVGLTETTFKELTKGYKPEEHLRVLFEESLNSNSNFEPPKKIKEASKKT...    |     |                                                        |     |     |     |     |                               |     |                    |     |                                                    |                                         |     |                      |     |                                                     |                                         |     |                      |     |                                                     |                                        |     |                     |     |                                                       |                             |     |                     |     |                                                       |                          |     |                     |     |                                                        |                                      |     |                     |     |                                                        |                                     |     |                     |     |                                                        |                                    |     |                     |     |                                                       |                                        |     |                     |     |                                                      |                                         |     |                     |     |                                                       |                                          |     |                     |     |                                                        |                                       |     |                     |     |                                                       |                          |     |                    |     |                                                       |                          |     |                     |     |                                                       |                                |     |                     |     |                                                       |                                  |     |                     |     |                                                      |                             |     |                     |     |                                                       |                               |     |                     |     |                                                       |
| <i>Prochlorococcus marinus</i> MIT9313                                                                                                                                                                                                                                                                                                                                                                                                                                                                                                                                                                                                                                                                                                                                                                                                                                                                                                                                                                                                                                                                                                                                                                                                                                                                                                                                                                                                                                                                                                                                                                                                                                                                                                                                                                                                                                                                                                                                                                                                                                                                                                                                                                                                                                                                                                                                                                                                                                                                                                                                                                                                                                                                                                                                                                                                                                                                                                                                                                                                                                                                                                                                                                                                                                                                                                                                                                                                                                                                                                                                                                                                                                                                                            | ... | DRKTIADSKRAFNDHDFPHVIPSLYRRRTDELLELVELHLLSHQKHFHPDALFAIGLSQVFDVFTSGYRPEAHVKTLPFDALCRSCGFDPNALRQAAQQT...   |     |                                                        |     |     |     |     |                               |     |                    |     |                                                    |                                         |     |                      |     |                                                     |                                         |     |                      |     |                                                     |                                        |     |                     |     |                                                       |                             |     |                     |     |                                                       |                          |     |                     |     |                                                        |                                      |     |                     |     |                                                        |                                     |     |                     |     |                                                        |                                    |     |                     |     |                                                       |                                        |     |                     |     |                                                      |                                         |     |                     |     |                                                       |                                          |     |                     |     |                                                        |                                       |     |                     |     |                                                       |                          |     |                    |     |                                                       |                          |     |                     |     |                                                       |                                |     |                     |     |                                                       |                                  |     |                     |     |                                                      |                             |     |                     |     |                                                       |                               |     |                     |     |                                                       |
| <i>Synechococcus</i> WH8102                                                                                                                                                                                                                                                                                                                                                                                                                                                                                                                                                                                                                                                                                                                                                                                                                                                                                                                                                                                                                                                                                                                                                                                                                                                                                                                                                                                                                                                                                                                                                                                                                                                                                                                                                                                                                                                                                                                                                                                                                                                                                                                                                                                                                                                                                                                                                                                                                                                                                                                                                                                                                                                                                                                                                                                                                                                                                                                                                                                                                                                                                                                                                                                                                                                                                                                                                                                                                                                                                                                                                                                                                                                                                                       | ... | ERHTIADSKRAFHQAFPHVIAPLYRRIADELLVELHLLSHQATFQANSLSFAVGLKTVFERFTQGYRPEMHPAALLSALCSSNGFDDEQLKQAAQHC...      |     |                                                        |     |     |     |     |                               |     |                    |     |                                                    |                                         |     |                      |     |                                                     |                                         |     |                      |     |                                                     |                                        |     |                     |     |                                                       |                             |     |                     |     |                                                       |                          |     |                     |     |                                                        |                                      |     |                     |     |                                                        |                                     |     |                     |     |                                                        |                                    |     |                     |     |                                                       |                                        |     |                     |     |                                                      |                                         |     |                     |     |                                                       |                                          |     |                     |     |                                                        |                                       |     |                     |     |                                                       |                          |     |                    |     |                                                       |                          |     |                     |     |                                                       |                                |     |                     |     |                                                       |                                  |     |                     |     |                                                      |                             |     |                     |     |                                                       |                               |     |                     |     |                                                       |
| <i>Anabaena</i> PCC 7102                                                                                                                                                                                                                                                                                                                                                                                                                                                                                                                                                                                                                                                                                                                                                                                                                                                                                                                                                                                                                                                                                                                                                                                                                                                                                                                                                                                                                                                                                                                                                                                                                                                                                                                                                                                                                                                                                                                                                                                                                                                                                                                                                                                                                                                                                                                                                                                                                                                                                                                                                                                                                                                                                                                                                                                                                                                                                                                                                                                                                                                                                                                                                                                                                                                                                                                                                                                                                                                                                                                                                                                                                                                                                                          | ... | LLRTVSDTKRFFYALHTRPINTIYRRVVEELMVEMHLLSVNVDYSNPIYALGVVTFDFRMEGYQPERDKESIFSAICQAVEQEPQRYRQDAERL...         |     |                                                        |     |     |     |     |                               |     |                    |     |                                                    |                                         |     |                      |     |                                                     |                                         |     |                      |     |                                                     |                                        |     |                     |     |                                                       |                             |     |                     |     |                                                       |                          |     |                     |     |                                                        |                                      |     |                     |     |                                                        |                                     |     |                     |     |                                                        |                                    |     |                     |     |                                                       |                                        |     |                     |     |                                                      |                                         |     |                     |     |                                                       |                                          |     |                     |     |                                                        |                                       |     |                     |     |                                                       |                          |     |                    |     |                                                       |                          |     |                     |     |                                                       |                                |     |                     |     |                                                       |                                  |     |                     |     |                                                      |                             |     |                     |     |                                                       |                               |     |                     |     |                                                       |
| <i>Anabaena variabilis</i> ATCC29413                                                                                                                                                                                                                                                                                                                                                                                                                                                                                                                                                                                                                                                                                                                                                                                                                                                                                                                                                                                                                                                                                                                                                                                                                                                                                                                                                                                                                                                                                                                                                                                                                                                                                                                                                                                                                                                                                                                                                                                                                                                                                                                                                                                                                                                                                                                                                                                                                                                                                                                                                                                                                                                                                                                                                                                                                                                                                                                                                                                                                                                                                                                                                                                                                                                                                                                                                                                                                                                                                                                                                                                                                                                                                              | ... | LLRTVSDTKRFFYALHTRPINTIYRRVVEELMVEMHLLSVNVDYSNPIYALGVVTFDFRMEGYQPERDKESIFSAICQAVEQEPQRYRQDAERL...         |     |                                                        |     |     |     |     |                               |     |                    |     |                                                    |                                         |     |                      |     |                                                     |                                         |     |                      |     |                                                     |                                        |     |                     |     |                                                       |                             |     |                     |     |                                                       |                          |     |                     |     |                                                        |                                      |     |                     |     |                                                        |                                     |     |                     |     |                                                        |                                    |     |                     |     |                                                       |                                        |     |                     |     |                                                      |                                         |     |                     |     |                                                       |                                          |     |                     |     |                                                        |                                       |     |                     |     |                                                       |                          |     |                    |     |                                                       |                          |     |                     |     |                                                       |                                |     |                     |     |                                                       |                                  |     |                     |     |                                                      |                             |     |                     |     |                                                       |                               |     |                     |     |                                                       |
| <i>Nostoc punctiforme</i> PCC 73102                                                                                                                                                                                                                                                                                                                                                                                                                                                                                                                                                                                                                                                                                                                                                                                                                                                                                                                                                                                                                                                                                                                                                                                                                                                                                                                                                                                                                                                                                                                                                                                                                                                                                                                                                                                                                                                                                                                                                                                                                                                                                                                                                                                                                                                                                                                                                                                                                                                                                                                                                                                                                                                                                                                                                                                                                                                                                                                                                                                                                                                                                                                                                                                                                                                                                                                                                                                                                                                                                                                                                                                                                                                                                               | ... | NVRTVSDTKRFFYNLHTRPINTIYRRVVEELMVEMHLLSVNIDFSYNPIYALGVVTFDFRMEGYQPERDQESIFNALCRAIEQDPQHYRQDAERL...        |     |                                                        |     |     |     |     |                               |     |                    |     |                                                    |                                         |     |                      |     |                                                     |                                         |     |                      |     |                                                     |                                        |     |                     |     |                                                       |                             |     |                     |     |                                                       |                          |     |                     |     |                                                        |                                      |     |                     |     |                                                        |                                     |     |                     |     |                                                        |                                    |     |                     |     |                                                       |                                        |     |                     |     |                                                      |                                         |     |                     |     |                                                       |                                          |     |                     |     |                                                        |                                       |     |                     |     |                                                       |                          |     |                    |     |                                                       |                          |     |                     |     |                                                       |                                |     |                     |     |                                                       |                                  |     |                     |     |                                                      |                             |     |                     |     |                                                       |                               |     |                     |     |                                                       |
| <i>Crocospaera watsonii</i> WH8501                                                                                                                                                                                                                                                                                                                                                                                                                                                                                                                                                                                                                                                                                                                                                                                                                                                                                                                                                                                                                                                                                                                                                                                                                                                                                                                                                                                                                                                                                                                                                                                                                                                                                                                                                                                                                                                                                                                                                                                                                                                                                                                                                                                                                                                                                                                                                                                                                                                                                                                                                                                                                                                                                                                                                                                                                                                                                                                                                                                                                                                                                                                                                                                                                                                                                                                                                                                                                                                                                                                                                                                                                                                                                                | ... | NIRTVSDTKRFFYGYHTQPINSIYRRFVEELLVEMHLLSVNIDFSYDPIYALGVVTFQRFMQGYSPESDKPSIFNALCQAVDGSSEKHYQEAIAI...        |     |                                                        |     |     |     |     |                               |     |                    |     |                                                    |                                         |     |                      |     |                                                     |                                         |     |                      |     |                                                     |                                        |     |                     |     |                                                       |                             |     |                     |     |                                                       |                          |     |                     |     |                                                        |                                      |     |                     |     |                                                        |                                     |     |                     |     |                                                        |                                    |     |                     |     |                                                       |                                        |     |                     |     |                                                      |                                         |     |                     |     |                                                       |                                          |     |                     |     |                                                        |                                       |     |                     |     |                                                       |                          |     |                    |     |                                                       |                          |     |                     |     |                                                       |                                |     |                     |     |                                                       |                                  |     |                     |     |                                                      |                             |     |                     |     |                                                       |                               |     |                     |     |                                                       |
| <i>Tricodesmium ertythraeum</i> IMS101                                                                                                                                                                                                                                                                                                                                                                                                                                                                                                                                                                                                                                                                                                                                                                                                                                                                                                                                                                                                                                                                                                                                                                                                                                                                                                                                                                                                                                                                                                                                                                                                                                                                                                                                                                                                                                                                                                                                                                                                                                                                                                                                                                                                                                                                                                                                                                                                                                                                                                                                                                                                                                                                                                                                                                                                                                                                                                                                                                                                                                                                                                                                                                                                                                                                                                                                                                                                                                                                                                                                                                                                                                                                                            | ... | NTRTVSDTKKTFYHFHTRPINSIYRNVIEELLVEMHLLSVNVDYSNPFYALGVVTFDFRMEGYQPERDKESIFNALIQQEEEDPNKYRSDAKGL...         |     |                                                        |     |     |     |     |                               |     |                    |     |                                                    |                                         |     |                      |     |                                                     |                                         |     |                      |     |                                                     |                                        |     |                     |     |                                                       |                             |     |                     |     |                                                       |                          |     |                     |     |                                                        |                                      |     |                     |     |                                                        |                                     |     |                     |     |                                                        |                                    |     |                     |     |                                                       |                                        |     |                     |     |                                                      |                                         |     |                     |     |                                                       |                                          |     |                     |     |                                                        |                                       |     |                     |     |                                                       |                          |     |                    |     |                                                       |                          |     |                     |     |                                                       |                                |     |                     |     |                                                       |                                  |     |                     |     |                                                      |                             |     |                     |     |                                                       |                               |     |                     |     |                                                       |
| <i>Synechococcus elongatus</i> PCC 7942                                                                                                                                                                                                                                                                                                                                                                                                                                                                                                                                                                                                                                                                                                                                                                                                                                                                                                                                                                                                                                                                                                                                                                                                                                                                                                                                                                                                                                                                                                                                                                                                                                                                                                                                                                                                                                                                                                                                                                                                                                                                                                                                                                                                                                                                                                                                                                                                                                                                                                                                                                                                                                                                                                                                                                                                                                                                                                                                                                                                                                                                                                                                                                                                                                                                                                                                                                                                                                                                                                                                                                                                                                                                                           | ... | SVPTVSDSKRAFYAAYPRPINFLYRRVVEELLVEMHLLSVNIDFSYDPIYALGVVTFDFRMEGYQPERDQESIFNALCQAVEQEPQRYRQDAERL...        |     |                                                        |     |     |     |     |                               |     |                    |     |                                                    |                                         |     |                      |     |                                                     |                                         |     |                      |     |                                                     |                                        |     |                     |     |                                                       |                             |     |                     |     |                                                       |                          |     |                     |     |                                                        |                                      |     |                     |     |                                                        |                                     |     |                     |     |                                                        |                                    |     |                     |     |                                                       |                                        |     |                     |     |                                                      |                                         |     |                     |     |                                                       |                                          |     |                     |     |                                                        |                                       |     |                     |     |                                                       |                          |     |                    |     |                                                       |                          |     |                     |     |                                                       |                                |     |                     |     |                                                       |                                  |     |                     |     |                                                      |                             |     |                     |     |                                                       |                               |     |                     |     |                                                       |
| <i>Thermosynechococcus elongatus</i> BP1                                                                                                                                                                                                                                                                                                                                                                                                                                                                                                                                                                                                                                                                                                                                                                                                                                                                                                                                                                                                                                                                                                                                                                                                                                                                                                                                                                                                                                                                                                                                                                                                                                                                                                                                                                                                                                                                                                                                                                                                                                                                                                                                                                                                                                                                                                                                                                                                                                                                                                                                                                                                                                                                                                                                                                                                                                                                                                                                                                                                                                                                                                                                                                                                                                                                                                                                                                                                                                                                                                                                                                                                                                                                                          | ... | NPRTVSDTKRAFYAATHRPIHSIYRRFIEELLVIEHLLRVNVDYRYSPLFALGVVTFDFRMEGYQPEGDRDRIFHALCVAEEMNPQQLKEDAAQSW...       |     |                                                        |     |     |     |     |                               |     |                    |     |                                                    |                                         |     |                      |     |                                                     |                                         |     |                      |     |                                                     |                                        |     |                     |     |                                                       |                             |     |                     |     |                                                       |                          |     |                     |     |                                                        |                                      |     |                     |     |                                                        |                                     |     |                     |     |                                                        |                                    |     |                     |     |                                                       |                                        |     |                     |     |                                                      |                                         |     |                     |     |                                                       |                                          |     |                     |     |                                                        |                                       |     |                     |     |                                                       |                          |     |                    |     |                                                       |                          |     |                     |     |                                                       |                                |     |                     |     |                                                       |                                  |     |                     |     |                                                      |                             |     |                     |     |                                                       |                               |     |                     |     |                                                       |
| <i>Gloeobacter violaceus</i> PCC 7421                                                                                                                                                                                                                                                                                                                                                                                                                                                                                                                                                                                                                                                                                                                                                                                                                                                                                                                                                                                                                                                                                                                                                                                                                                                                                                                                                                                                                                                                                                                                                                                                                                                                                                                                                                                                                                                                                                                                                                                                                                                                                                                                                                                                                                                                                                                                                                                                                                                                                                                                                                                                                                                                                                                                                                                                                                                                                                                                                                                                                                                                                                                                                                                                                                                                                                                                                                                                                                                                                                                                                                                                                                                                                             | ... | SKRTVSDSKRAFFAAYPRPVNSIYRRVIDELLVVEHLLITNQDFRHDPLFATGLLTAYQALMEGYTPVEQRDAILRALCTALELSYQLHTDAAQW...        |     |                                                        |     |     |     |     |                               |     |                    |     |                                                    |                                         |     |                      |     |                                                     |                                         |     |                      |     |                                                     |                                        |     |                     |     |                                                       |                             |     |                     |     |                                                       |                          |     |                     |     |                                                        |                                      |     |                     |     |                                                        |                                     |     |                     |     |                                                        |                                    |     |                     |     |                                                       |                                        |     |                     |     |                                                      |                                         |     |                     |     |                                                       |                                          |     |                     |     |                                                        |                                       |     |                     |     |                                                       |                          |     |                    |     |                                                       |                          |     |                     |     |                                                       |                                |     |                     |     |                                                       |                                  |     |                     |     |                                                      |                             |     |                     |     |                                                       |                               |     |                     |     |                                                       |
| <i>Solanum tuberosum</i>                                                                                                                                                                                                                                                                                                                                                                                                                                                                                                                                                                                                                                                                                                                                                                                                                                                                                                                                                                                                                                                                                                                                                                                                                                                                                                                                                                                                                                                                                                                                                                                                                                                                                                                                                                                                                                                                                                                                                                                                                                                                                                                                                                                                                                                                                                                                                                                                                                                                                                                                                                                                                                                                                                                                                                                                                                                                                                                                                                                                                                                                                                                                                                                                                                                                                                                                                                                                                                                                                                                                                                                                                                                                                                          | ... | DLPTVADTKLFLKFLTAYKRPIPTVYNTVLQELLVQQLHLMRYKSTYQYDVPVDFALGFVTVYDQLMEGYPSSEEDRNAIFKAYIEALKEDPEQYRADAQKL... |     |                                                        |     |     |     |     |                               |     |                    |     |                                                    |                                         |     |                      |     |                                                     |                                         |     |                      |     |                                                     |                                        |     |                     |     |                                                       |                             |     |                     |     |                                                       |                          |     |                     |     |                                                        |                                      |     |                     |     |                                                        |                                     |     |                     |     |                                                        |                                    |     |                     |     |                                                       |                                        |     |                     |     |                                                      |                                         |     |                     |     |                                                       |                                          |     |                     |     |                                                        |                                       |     |                     |     |                                                       |                          |     |                    |     |                                                       |                          |     |                     |     |                                                       |                                |     |                     |     |                                                       |                                  |     |                     |     |                                                      |                             |     |                     |     |                                                       |                               |     |                     |     |                                                       |
| <i>Triticum aestivum</i>                                                                                                                                                                                                                                                                                                                                                                                                                                                                                                                                                                                                                                                                                                                                                                                                                                                                                                                                                                                                                                                                                                                                                                                                                                                                                                                                                                                                                                                                                                                                                                                                                                                                                                                                                                                                                                                                                                                                                                                                                                                                                                                                                                                                                                                                                                                                                                                                                                                                                                                                                                                                                                                                                                                                                                                                                                                                                                                                                                                                                                                                                                                                                                                                                                                                                                                                                                                                                                                                                                                                                                                                                                                                                                          | ... | IPPTVADTKMNFLLKSYKRPISYISTVLQELLVQQLHLMRYKSTYQYDVPVDFALGFVTVYDQLMEGYPSSTEDRDAIFKSYVTALNEDPEQYRADAQRM...   |     |                                                        |     |     |     |     |                               |     |                    |     |                                                    |                                         |     |                      |     |                                                     |                                         |     |                      |     |                                                     |                                        |     |                     |     |                                                       |                             |     |                     |     |                                                       |                          |     |                     |     |                                                        |                                      |     |                     |     |                                                        |                                     |     |                     |     |                                                        |                                    |     |                     |     |                                                       |                                        |     |                     |     |                                                      |                                         |     |                     |     |                                                       |                                          |     |                     |     |                                                        |                                       |     |                     |     |                                                       |                          |     |                    |     |                                                       |                          |     |                     |     |                                                       |                                |     |                     |     |                                                       |                                  |     |                     |     |                                                      |                             |     |                     |     |                                                       |                               |     |                     |     |                                                       |
| <i>Oryza sativa</i> (japonica)                                                                                                                                                                                                                                                                                                                                                                                                                                                                                                                                                                                                                                                                                                                                                                                                                                                                                                                                                                                                                                                                                                                                                                                                                                                                                                                                                                                                                                                                                                                                                                                                                                                                                                                                                                                                                                                                                                                                                                                                                                                                                                                                                                                                                                                                                                                                                                                                                                                                                                                                                                                                                                                                                                                                                                                                                                                                                                                                                                                                                                                                                                                                                                                                                                                                                                                                                                                                                                                                                                                                                                                                                                                                                                    | ... | VPPTVAETKMNFLKSYKRPILSIYSTVLQELLVQQLHLMRYKSTYQYDVPVDFALGFVTVYDQLMEGYPSNEDRDAIFKAYITALNEDPEQYRADAQKM...    |     |                                                        |     |     |     |     |                               |     |                    |     |                                                    |                                         |     |                      |     |                                                     |                                         |     |                      |     |                                                     |                                        |     |                     |     |                                                       |                             |     |                     |     |                                                       |                          |     |                     |     |                                                        |                                      |     |                     |     |                                                        |                                     |     |                     |     |                                                        |                                    |     |                     |     |                                                       |                                        |     |                     |     |                                                      |                                         |     |                     |     |                                                       |                                          |     |                     |     |                                                        |                                       |     |                     |     |                                                       |                          |     |                    |     |                                                       |                          |     |                     |     |                                                       |                                |     |                     |     |                                                       |                                  |     |                     |     |                                                      |                             |     |                     |     |                                                       |                               |     |                     |     |                                                       |
| <i>Chlamydomonas reinhardtii</i>                                                                                                                                                                                                                                                                                                                                                                                                                                                                                                                                                                                                                                                                                                                                                                                                                                                                                                                                                                                                                                                                                                                                                                                                                                                                                                                                                                                                                                                                                                                                                                                                                                                                                                                                                                                                                                                                                                                                                                                                                                                                                                                                                                                                                                                                                                                                                                                                                                                                                                                                                                                                                                                                                                                                                                                                                                                                                                                                                                                                                                                                                                                                                                                                                                                                                                                                                                                                                                                                                                                                                                                                                                                                                                  | ... | KPPTVAETKAKFLSGYNKPIASIYSTVLQELLVQQLHFMRYSKNYQYNPIFALGFVSVYEQILELSLAAE-RGAIKAYVDALGEDADKYKRDAASAL...      |     |                                                        |     |     |     |     |                               |     |                    |     |                                                    |                                         |     |                      |     |                                                     |                                         |     |                      |     |                                                     |                                        |     |                     |     |                                                       |                             |     |                     |     |                                                       |                          |     |                     |     |                                                        |                                      |     |                     |     |                                                        |                                     |     |                     |     |                                                        |                                    |     |                     |     |                                                       |                                        |     |                     |     |                                                      |                                         |     |                     |     |                                                       |                                          |     |                     |     |                                                        |                                       |     |                     |     |                                                       |                          |     |                    |     |                                                       |                          |     |                     |     |                                                       |                                |     |                     |     |                                                       |                                  |     |                     |     |                                                      |                             |     |                     |     |                                                       |                               |     |                     |     |                                                       |
| <i>Arabidopsis thaliana</i>                                                                                                                                                                                                                                                                                                                                                                                                                                                                                                                                                                                                                                                                                                                                                                                                                                                                                                                                                                                                                                                                                                                                                                                                                                                                                                                                                                                                                                                                                                                                                                                                                                                                                                                                                                                                                                                                                                                                                                                                                                                                                                                                                                                                                                                                                                                                                                                                                                                                                                                                                                                                                                                                                                                                                                                                                                                                                                                                                                                                                                                                                                                                                                                                                                                                                                                                                                                                                                                                                                                                                                                                                                                                                                       | ... | DVPPVSETKSKFLKAYKRPIPSIYNTVLQELLVQQLHLMRYKSTYQYDVPVDFALGFVTVYDQLMEGYPSDQDRDAIFKAYIEALNEDPKQYRIDAQKM...    |     |                                                        |     |     |     |     |                               |     |                    |     |                                                    |                                         |     |                      |     |                                                     |                                         |     |                      |     |                                                     |                                        |     |                     |     |                                                       |                             |     |                     |     |                                                       |                          |     |                     |     |                                                        |                                      |     |                     |     |                                                        |                                     |     |                     |     |                                                        |                                    |     |                     |     |                                                       |                                        |     |                     |     |                                                      |                                         |     |                     |     |                                                       |                                          |     |                     |     |                                                        |                                       |     |                     |     |                                                       |                          |     |                    |     |                                                       |                          |     |                     |     |                                                       |                                |     |                     |     |                                                       |                                  |     |                     |     |                                                      |                             |     |                     |     |                                                       |                               |     |                     |     |                                                       |
| <i>Chlorella virus</i> PBCV-1                                                                                                                                                                                                                                                                                                                                                                                                                                                                                                                                                                                                                                                                                                                                                                                                                                                                                                                                                                                                                                                                                                                                                                                                                                                                                                                                                                                                                                                                                                                                                                                                                                                                                                                                                                                                                                                                                                                                                                                                                                                                                                                                                                                                                                                                                                                                                                                                                                                                                                                                                                                                                                                                                                                                                                                                                                                                                                                                                                                                                                                                                                                                                                                                                                                                                                                                                                                                                                                                                                                                                                                                                                                                                                     | ... | SPPTVSDTKRIFANYKLLFLYNTPIQNMLVKQHIHRYNKNYTSDVSALGIVTTLDSVLNTPFDDDE-KTSIKNAFIIISLNEDEPEMYYSNIESL...        |     |                                                        |     |     |     |     |                               |     |                    |     |                                                    |                                         |     |                      |     |                                                     |                                         |     |                      |     |                                                     |                                        |     |                     |     |                                                       |                             |     |                     |     |                                                       |                          |     |                     |     |                                                        |                                      |     |                     |     |                                                        |                                     |     |                     |     |                                                        |                                    |     |                     |     |                                                       |                                        |     |                     |     |                                                      |                                         |     |                     |     |                                                       |                                          |     |                     |     |                                                        |                                       |     |                     |     |                                                       |                          |     |                    |     |                                                       |                          |     |                     |     |                                                       |                                |     |                     |     |                                                       |                                  |     |                     |     |                                                      |                             |     |                     |     |                                                       |                               |     |                     |     |                                                       |
| <table border="0" style="width: 100%; border-collapse: collapse;"> <tr> <td style="width: 30%;"></td> <td style="width: 10%; text-align: center;">135</td> <td style="width: 10%; text-align: center;">153</td> <td style="width: 10%; text-align: center;">170</td> <td style="width: 10%; text-align: center;">219</td> </tr> <tr> <td><i>Synechocystis</i> PCC 6803</td> <td>...</td> <td>RHKFKYSRLFAIGLYTLA</td> <td>...</td> <td>LTRLSELDSLKDVVKDLDLYRSNLEKVDQLKLVLEDAEAERKKKEKQ...</td> </tr> <tr> <td><i>Prochlorococcus marinus</i> CCMP1375</td> <td>...</td> <td>GDKKYSSLRHLAIGIYELIS</td> <td>...</td> <td>ISECVEALGFSKDRVEKIDINQYKNSMEKIKEMMELIKLTVETTKRKAKLN</td> </tr> <tr> <td><i>Prochlorococcus marinus</i> CCMP1986</td> <td>...</td> <td>DSNLYSSRLNLNGIYILIIA</td> <td>...</td> <td>ISDIINKLNLNFKNAEKDIDIGIYKSSILKMEQAKELLQEAIKDKKEKKK-</td> </tr> <tr> <td><i>Prochlorococcus marinus</i> MIT9313</td> <td>...</td> <td>STTFHYSRLMAVGLLSLLA</td> <td>...</td> <td>AHELSESVGFSKARVEKDLNLYKSNLEKMAQAVELTEQILESERKKREQN...</td> </tr> <tr> <td><i>Synechococcus</i> WH8102</td> <td>...</td> <td>SDGAHYSRLMAVGLLALLE</td> <td>...</td> <td>AVKLSVDLGLPAERVEKDLTVFSSNSERMEQAVELMQETLAADRKKKEKR...</td> </tr> <tr> <td><i>Anabaena</i> PCC 7102</td> <td>...</td> <td>NSNFKYSRLFAIGLFTLLE</td> <td>...</td> <td>LKSI AAGLHLSDDKFSKDLLEYRSNLDKMTQALAVMADMLTADRKKREQR...</td> </tr> <tr> <td><i>Anabaena variabilis</i> ATCC29413</td> <td>...</td> <td>NPNFKYSRLFAIGLFTLLE</td> <td>...</td> <td>LKTI AAGLHLSDDKLSKDLLEYRSNLDKMTQALAVMADMLTADRKKREQR...</td> </tr> <tr> <td><i>Nostoc punctiforme</i> PCC 73102</td> <td>...</td> <td>NPNFKYRNLFAIGVFSLLE</td> <td>...</td> <td>LKAI AAGLHVSDDKLNKDLLEYRSNLDKMAQALVVMADMLSADRKKREQR...</td> </tr> <tr> <td><i>Crocospaera watsonii</i> WH8501</td> <td>...</td> <td>NPKFKYSRLLAIGLYTLLM</td> <td>...</td> <td>IKEVSEALKFSPEKLRKDLDLYRSNLDKMQQLLTVIEDSLEADRKKRAST...</td> </tr> <tr> <td><i>Tricodesmium ertythraeum</i> IMS101</td> <td>...</td> <td>NSKFRYSRLFAIGLFTLLE</td> <td>...</td> <td>LKKICQSLNVEKLLKIDIDLYLSNLERVAQARSAMEDTLAAMRKKREKR...</td> </tr> <tr> <td><i>Synechococcus elongatus</i> PCC 7942</td> <td>...</td> <td>RSEFKYSRLFAIGLFSLLE</td> <td>...</td> <td>VTAIAERFHLPSDKLQKDLDLYRSNLEKMEQARITMEEAIQADRKKREQR...</td> </tr> <tr> <td><i>Thermosynechococcus elongatus</i> BP1</td> <td>...</td> <td>NHTGKYSRLHAVGLYAFLO</td> <td>...</td> <td>LDQLAPVILPLPIEKVKRDLLEYRSNLDKINQARSLMKELVEQERKKRAQQ...</td> </tr> <tr> <td><i>Gloeobacter violaceus</i> PCC 7421</td> <td>...</td> <td>AERFKYSRLFSLGLANILE</td> <td>...</td> <td>LQQICTYKLDYNRVVRDLDFHFSVLERIKRSKEVVDELSQTEERRKREER...</td> </tr> <tr> <td><i>Solanum tuberosum</i></td> <td>...</td> <td>KDGFYSRLFAVGLFRLLE</td> <td>...</td> <td>LEKLCAALNVNKKSVDRDLVDYRNLLSKLVQAKELLKEYVEREKKKRGER...</td> </tr> <tr> <td><i>Triticum aestivum</i></td> <td>...</td> <td>KGNFSYSRFFAVGLFRLLE</td> <td>...</td> <td>LDKLCAALNINKKSVDRDLVDYRNLLSKLVQAKELLKEYVEREKKKREER...</td> </tr> <tr> <td><i>Oryza sativa</i> (japonica)</td> <td>...</td> <td>KGSFSYSRFFAVGLFRLLE</td> <td>...</td> <td>LDKLCAALNINKKSVDRDLVDYRNLLSKLVQAKELLKEYVEREKKKREER...</td> </tr> <tr> <td><i>Chlamydomonas reinhardtii</i></td> <td>...</td> <td>AGAFSYNKFVAIGLFRLLE</td> <td>...</td> <td>LEKLVKAVGVKPEAVNRDLMYKGVLSKLAALKELMRFVEREKKKQAEER...</td> </tr> <tr> <td><i>Arabidopsis thaliana</i></td> <td>...</td> <td>KEGFSYSRFFAVGLFRLLE</td> <td>...</td> <td>LDKLCASLNINKKSVDRDLVDYRNLLSKLVQAKELLKEYVEREKKKQGER...</td> </tr> <tr> <td><i>Chlorella virus</i> PBCV-1</td> <td>...</td> <td>NDKYVYSSFAAVGIFKLLQ</td> <td>...</td> <td>VKHLSESIGFKGBLVHKDIATFFSLLKYIESSQKLADDIREESLKRKSKS...</td> </tr> </table> |     |                                                                                                           |     |                                                        | 135 | 153 | 170 | 219 | <i>Synechocystis</i> PCC 6803 | ... | RHKFKYSRLFAIGLYTLA | ... | LTRLSELDSLKDVVKDLDLYRSNLEKVDQLKLVLEDAEAERKKKEKQ... | <i>Prochlorococcus marinus</i> CCMP1375 | ... | GDKKYSSLRHLAIGIYELIS | ... | ISECVEALGFSKDRVEKIDINQYKNSMEKIKEMMELIKLTVETTKRKAKLN | <i>Prochlorococcus marinus</i> CCMP1986 | ... | DSNLYSSRLNLNGIYILIIA | ... | ISDIINKLNLNFKNAEKDIDIGIYKSSILKMEQAKELLQEAIKDKKEKKK- | <i>Prochlorococcus marinus</i> MIT9313 | ... | STTFHYSRLMAVGLLSLLA | ... | AHELSESVGFSKARVEKDLNLYKSNLEKMAQAVELTEQILESERKKREQN... | <i>Synechococcus</i> WH8102 | ... | SDGAHYSRLMAVGLLALLE | ... | AVKLSVDLGLPAERVEKDLTVFSSNSERMEQAVELMQETLAADRKKKEKR... | <i>Anabaena</i> PCC 7102 | ... | NSNFKYSRLFAIGLFTLLE | ... | LKSI AAGLHLSDDKFSKDLLEYRSNLDKMTQALAVMADMLTADRKKREQR... | <i>Anabaena variabilis</i> ATCC29413 | ... | NPNFKYSRLFAIGLFTLLE | ... | LKTI AAGLHLSDDKLSKDLLEYRSNLDKMTQALAVMADMLTADRKKREQR... | <i>Nostoc punctiforme</i> PCC 73102 | ... | NPNFKYRNLFAIGVFSLLE | ... | LKAI AAGLHVSDDKLNKDLLEYRSNLDKMAQALVVMADMLSADRKKREQR... | <i>Crocospaera watsonii</i> WH8501 | ... | NPKFKYSRLLAIGLYTLLM | ... | IKEVSEALKFSPEKLRKDLDLYRSNLDKMQQLLTVIEDSLEADRKKRAST... | <i>Tricodesmium ertythraeum</i> IMS101 | ... | NSKFRYSRLFAIGLFTLLE | ... | LKKICQSLNVEKLLKIDIDLYLSNLERVAQARSAMEDTLAAMRKKREKR... | <i>Synechococcus elongatus</i> PCC 7942 | ... | RSEFKYSRLFAIGLFSLLE | ... | VTAIAERFHLPSDKLQKDLDLYRSNLEKMEQARITMEEAIQADRKKREQR... | <i>Thermosynechococcus elongatus</i> BP1 | ... | NHTGKYSRLHAVGLYAFLO | ... | LDQLAPVILPLPIEKVKRDLLEYRSNLDKINQARSLMKELVEQERKKRAQQ... | <i>Gloeobacter violaceus</i> PCC 7421 | ... | AERFKYSRLFSLGLANILE | ... | LQQICTYKLDYNRVVRDLDFHFSVLERIKRSKEVVDELSQTEERRKREER... | <i>Solanum tuberosum</i> | ... | KDGFYSRLFAVGLFRLLE | ... | LEKLCAALNVNKKSVDRDLVDYRNLLSKLVQAKELLKEYVEREKKKRGER... | <i>Triticum aestivum</i> | ... | KGNFSYSRFFAVGLFRLLE | ... | LDKLCAALNINKKSVDRDLVDYRNLLSKLVQAKELLKEYVEREKKKREER... | <i>Oryza sativa</i> (japonica) | ... | KGSFSYSRFFAVGLFRLLE | ... | LDKLCAALNINKKSVDRDLVDYRNLLSKLVQAKELLKEYVEREKKKREER... | <i>Chlamydomonas reinhardtii</i> | ... | AGAFSYNKFVAIGLFRLLE | ... | LEKLVKAVGVKPEAVNRDLMYKGVLSKLAALKELMRFVEREKKKQAEER... | <i>Arabidopsis thaliana</i> | ... | KEGFSYSRFFAVGLFRLLE | ... | LDKLCASLNINKKSVDRDLVDYRNLLSKLVQAKELLKEYVEREKKKQGER... | <i>Chlorella virus</i> PBCV-1 | ... | NDKYVYSSFAAVGIFKLLQ | ... | VKHLSESIGFKGBLVHKDIATFFSLLKYIESSQKLADDIREESLKRKSKS... |
|                                                                                                                                                                                                                                                                                                                                                                                                                                                                                                                                                                                                                                                                                                                                                                                                                                                                                                                                                                                                                                                                                                                                                                                                                                                                                                                                                                                                                                                                                                                                                                                                                                                                                                                                                                                                                                                                                                                                                                                                                                                                                                                                                                                                                                                                                                                                                                                                                                                                                                                                                                                                                                                                                                                                                                                                                                                                                                                                                                                                                                                                                                                                                                                                                                                                                                                                                                                                                                                                                                                                                                                                                                                                                                                                   | 135 | 153                                                                                                       | 170 | 219                                                    |     |     |     |     |                               |     |                    |     |                                                    |                                         |     |                      |     |                                                     |                                         |     |                      |     |                                                     |                                        |     |                     |     |                                                       |                             |     |                     |     |                                                       |                          |     |                     |     |                                                        |                                      |     |                     |     |                                                        |                                     |     |                     |     |                                                        |                                    |     |                     |     |                                                       |                                        |     |                     |     |                                                      |                                         |     |                     |     |                                                       |                                          |     |                     |     |                                                        |                                       |     |                     |     |                                                       |                          |     |                    |     |                                                       |                          |     |                     |     |                                                       |                                |     |                     |     |                                                       |                                  |     |                     |     |                                                      |                             |     |                     |     |                                                       |                               |     |                     |     |                                                       |
| <i>Synechocystis</i> PCC 6803                                                                                                                                                                                                                                                                                                                                                                                                                                                                                                                                                                                                                                                                                                                                                                                                                                                                                                                                                                                                                                                                                                                                                                                                                                                                                                                                                                                                                                                                                                                                                                                                                                                                                                                                                                                                                                                                                                                                                                                                                                                                                                                                                                                                                                                                                                                                                                                                                                                                                                                                                                                                                                                                                                                                                                                                                                                                                                                                                                                                                                                                                                                                                                                                                                                                                                                                                                                                                                                                                                                                                                                                                                                                                                     | ... | RHKFKYSRLFAIGLYTLA                                                                                        | ... | LTRLSELDSLKDVVKDLDLYRSNLEKVDQLKLVLEDAEAERKKKEKQ...     |     |     |     |     |                               |     |                    |     |                                                    |                                         |     |                      |     |                                                     |                                         |     |                      |     |                                                     |                                        |     |                     |     |                                                       |                             |     |                     |     |                                                       |                          |     |                     |     |                                                        |                                      |     |                     |     |                                                        |                                     |     |                     |     |                                                        |                                    |     |                     |     |                                                       |                                        |     |                     |     |                                                      |                                         |     |                     |     |                                                       |                                          |     |                     |     |                                                        |                                       |     |                     |     |                                                       |                          |     |                    |     |                                                       |                          |     |                     |     |                                                       |                                |     |                     |     |                                                       |                                  |     |                     |     |                                                      |                             |     |                     |     |                                                       |                               |     |                     |     |                                                       |
| <i>Prochlorococcus marinus</i> CCMP1375                                                                                                                                                                                                                                                                                                                                                                                                                                                                                                                                                                                                                                                                                                                                                                                                                                                                                                                                                                                                                                                                                                                                                                                                                                                                                                                                                                                                                                                                                                                                                                                                                                                                                                                                                                                                                                                                                                                                                                                                                                                                                                                                                                                                                                                                                                                                                                                                                                                                                                                                                                                                                                                                                                                                                                                                                                                                                                                                                                                                                                                                                                                                                                                                                                                                                                                                                                                                                                                                                                                                                                                                                                                                                           | ... | GDKKYSSLRHLAIGIYELIS                                                                                      | ... | ISECVEALGFSKDRVEKIDINQYKNSMEKIKEMMELIKLTVETTKRKAKLN    |     |     |     |     |                               |     |                    |     |                                                    |                                         |     |                      |     |                                                     |                                         |     |                      |     |                                                     |                                        |     |                     |     |                                                       |                             |     |                     |     |                                                       |                          |     |                     |     |                                                        |                                      |     |                     |     |                                                        |                                     |     |                     |     |                                                        |                                    |     |                     |     |                                                       |                                        |     |                     |     |                                                      |                                         |     |                     |     |                                                       |                                          |     |                     |     |                                                        |                                       |     |                     |     |                                                       |                          |     |                    |     |                                                       |                          |     |                     |     |                                                       |                                |     |                     |     |                                                       |                                  |     |                     |     |                                                      |                             |     |                     |     |                                                       |                               |     |                     |     |                                                       |
| <i>Prochlorococcus marinus</i> CCMP1986                                                                                                                                                                                                                                                                                                                                                                                                                                                                                                                                                                                                                                                                                                                                                                                                                                                                                                                                                                                                                                                                                                                                                                                                                                                                                                                                                                                                                                                                                                                                                                                                                                                                                                                                                                                                                                                                                                                                                                                                                                                                                                                                                                                                                                                                                                                                                                                                                                                                                                                                                                                                                                                                                                                                                                                                                                                                                                                                                                                                                                                                                                                                                                                                                                                                                                                                                                                                                                                                                                                                                                                                                                                                                           | ... | DSNLYSSRLNLNGIYILIIA                                                                                      | ... | ISDIINKLNLNFKNAEKDIDIGIYKSSILKMEQAKELLQEAIKDKKEKKK-    |     |     |     |     |                               |     |                    |     |                                                    |                                         |     |                      |     |                                                     |                                         |     |                      |     |                                                     |                                        |     |                     |     |                                                       |                             |     |                     |     |                                                       |                          |     |                     |     |                                                        |                                      |     |                     |     |                                                        |                                     |     |                     |     |                                                        |                                    |     |                     |     |                                                       |                                        |     |                     |     |                                                      |                                         |     |                     |     |                                                       |                                          |     |                     |     |                                                        |                                       |     |                     |     |                                                       |                          |     |                    |     |                                                       |                          |     |                     |     |                                                       |                                |     |                     |     |                                                       |                                  |     |                     |     |                                                      |                             |     |                     |     |                                                       |                               |     |                     |     |                                                       |
| <i>Prochlorococcus marinus</i> MIT9313                                                                                                                                                                                                                                                                                                                                                                                                                                                                                                                                                                                                                                                                                                                                                                                                                                                                                                                                                                                                                                                                                                                                                                                                                                                                                                                                                                                                                                                                                                                                                                                                                                                                                                                                                                                                                                                                                                                                                                                                                                                                                                                                                                                                                                                                                                                                                                                                                                                                                                                                                                                                                                                                                                                                                                                                                                                                                                                                                                                                                                                                                                                                                                                                                                                                                                                                                                                                                                                                                                                                                                                                                                                                                            | ... | STTFHYSRLMAVGLLSLLA                                                                                       | ... | AHELSESVGFSKARVEKDLNLYKSNLEKMAQAVELTEQILESERKKREQN...  |     |     |     |     |                               |     |                    |     |                                                    |                                         |     |                      |     |                                                     |                                         |     |                      |     |                                                     |                                        |     |                     |     |                                                       |                             |     |                     |     |                                                       |                          |     |                     |     |                                                        |                                      |     |                     |     |                                                        |                                     |     |                     |     |                                                        |                                    |     |                     |     |                                                       |                                        |     |                     |     |                                                      |                                         |     |                     |     |                                                       |                                          |     |                     |     |                                                        |                                       |     |                     |     |                                                       |                          |     |                    |     |                                                       |                          |     |                     |     |                                                       |                                |     |                     |     |                                                       |                                  |     |                     |     |                                                      |                             |     |                     |     |                                                       |                               |     |                     |     |                                                       |
| <i>Synechococcus</i> WH8102                                                                                                                                                                                                                                                                                                                                                                                                                                                                                                                                                                                                                                                                                                                                                                                                                                                                                                                                                                                                                                                                                                                                                                                                                                                                                                                                                                                                                                                                                                                                                                                                                                                                                                                                                                                                                                                                                                                                                                                                                                                                                                                                                                                                                                                                                                                                                                                                                                                                                                                                                                                                                                                                                                                                                                                                                                                                                                                                                                                                                                                                                                                                                                                                                                                                                                                                                                                                                                                                                                                                                                                                                                                                                                       | ... | SDGAHYSRLMAVGLLALLE                                                                                       | ... | AVKLSVDLGLPAERVEKDLTVFSSNSERMEQAVELMQETLAADRKKKEKR...  |     |     |     |     |                               |     |                    |     |                                                    |                                         |     |                      |     |                                                     |                                         |     |                      |     |                                                     |                                        |     |                     |     |                                                       |                             |     |                     |     |                                                       |                          |     |                     |     |                                                        |                                      |     |                     |     |                                                        |                                     |     |                     |     |                                                        |                                    |     |                     |     |                                                       |                                        |     |                     |     |                                                      |                                         |     |                     |     |                                                       |                                          |     |                     |     |                                                        |                                       |     |                     |     |                                                       |                          |     |                    |     |                                                       |                          |     |                     |     |                                                       |                                |     |                     |     |                                                       |                                  |     |                     |     |                                                      |                             |     |                     |     |                                                       |                               |     |                     |     |                                                       |
| <i>Anabaena</i> PCC 7102                                                                                                                                                                                                                                                                                                                                                                                                                                                                                                                                                                                                                                                                                                                                                                                                                                                                                                                                                                                                                                                                                                                                                                                                                                                                                                                                                                                                                                                                                                                                                                                                                                                                                                                                                                                                                                                                                                                                                                                                                                                                                                                                                                                                                                                                                                                                                                                                                                                                                                                                                                                                                                                                                                                                                                                                                                                                                                                                                                                                                                                                                                                                                                                                                                                                                                                                                                                                                                                                                                                                                                                                                                                                                                          | ... | NSNFKYSRLFAIGLFTLLE                                                                                       | ... | LKSI AAGLHLSDDKFSKDLLEYRSNLDKMTQALAVMADMLTADRKKREQR... |     |     |     |     |                               |     |                    |     |                                                    |                                         |     |                      |     |                                                     |                                         |     |                      |     |                                                     |                                        |     |                     |     |                                                       |                             |     |                     |     |                                                       |                          |     |                     |     |                                                        |                                      |     |                     |     |                                                        |                                     |     |                     |     |                                                        |                                    |     |                     |     |                                                       |                                        |     |                     |     |                                                      |                                         |     |                     |     |                                                       |                                          |     |                     |     |                                                        |                                       |     |                     |     |                                                       |                          |     |                    |     |                                                       |                          |     |                     |     |                                                       |                                |     |                     |     |                                                       |                                  |     |                     |     |                                                      |                             |     |                     |     |                                                       |                               |     |                     |     |                                                       |
| <i>Anabaena variabilis</i> ATCC29413                                                                                                                                                                                                                                                                                                                                                                                                                                                                                                                                                                                                                                                                                                                                                                                                                                                                                                                                                                                                                                                                                                                                                                                                                                                                                                                                                                                                                                                                                                                                                                                                                                                                                                                                                                                                                                                                                                                                                                                                                                                                                                                                                                                                                                                                                                                                                                                                                                                                                                                                                                                                                                                                                                                                                                                                                                                                                                                                                                                                                                                                                                                                                                                                                                                                                                                                                                                                                                                                                                                                                                                                                                                                                              | ... | NPNFKYSRLFAIGLFTLLE                                                                                       | ... | LKTI AAGLHLSDDKLSKDLLEYRSNLDKMTQALAVMADMLTADRKKREQR... |     |     |     |     |                               |     |                    |     |                                                    |                                         |     |                      |     |                                                     |                                         |     |                      |     |                                                     |                                        |     |                     |     |                                                       |                             |     |                     |     |                                                       |                          |     |                     |     |                                                        |                                      |     |                     |     |                                                        |                                     |     |                     |     |                                                        |                                    |     |                     |     |                                                       |                                        |     |                     |     |                                                      |                                         |     |                     |     |                                                       |                                          |     |                     |     |                                                        |                                       |     |                     |     |                                                       |                          |     |                    |     |                                                       |                          |     |                     |     |                                                       |                                |     |                     |     |                                                       |                                  |     |                     |     |                                                      |                             |     |                     |     |                                                       |                               |     |                     |     |                                                       |
| <i>Nostoc punctiforme</i> PCC 73102                                                                                                                                                                                                                                                                                                                                                                                                                                                                                                                                                                                                                                                                                                                                                                                                                                                                                                                                                                                                                                                                                                                                                                                                                                                                                                                                                                                                                                                                                                                                                                                                                                                                                                                                                                                                                                                                                                                                                                                                                                                                                                                                                                                                                                                                                                                                                                                                                                                                                                                                                                                                                                                                                                                                                                                                                                                                                                                                                                                                                                                                                                                                                                                                                                                                                                                                                                                                                                                                                                                                                                                                                                                                                               | ... | NPNFKYRNLFAIGVFSLLE                                                                                       | ... | LKAI AAGLHVSDDKLNKDLLEYRSNLDKMAQALVVMADMLSADRKKREQR... |     |     |     |     |                               |     |                    |     |                                                    |                                         |     |                      |     |                                                     |                                         |     |                      |     |                                                     |                                        |     |                     |     |                                                       |                             |     |                     |     |                                                       |                          |     |                     |     |                                                        |                                      |     |                     |     |                                                        |                                     |     |                     |     |                                                        |                                    |     |                     |     |                                                       |                                        |     |                     |     |                                                      |                                         |     |                     |     |                                                       |                                          |     |                     |     |                                                        |                                       |     |                     |     |                                                       |                          |     |                    |     |                                                       |                          |     |                     |     |                                                       |                                |     |                     |     |                                                       |                                  |     |                     |     |                                                      |                             |     |                     |     |                                                       |                               |     |                     |     |                                                       |
| <i>Crocospaera watsonii</i> WH8501                                                                                                                                                                                                                                                                                                                                                                                                                                                                                                                                                                                                                                                                                                                                                                                                                                                                                                                                                                                                                                                                                                                                                                                                                                                                                                                                                                                                                                                                                                                                                                                                                                                                                                                                                                                                                                                                                                                                                                                                                                                                                                                                                                                                                                                                                                                                                                                                                                                                                                                                                                                                                                                                                                                                                                                                                                                                                                                                                                                                                                                                                                                                                                                                                                                                                                                                                                                                                                                                                                                                                                                                                                                                                                | ... | NPKFKYSRLLAIGLYTLLM                                                                                       | ... | IKEVSEALKFSPEKLRKDLDLYRSNLDKMQQLLTVIEDSLEADRKKRAST...  |     |     |     |     |                               |     |                    |     |                                                    |                                         |     |                      |     |                                                     |                                         |     |                      |     |                                                     |                                        |     |                     |     |                                                       |                             |     |                     |     |                                                       |                          |     |                     |     |                                                        |                                      |     |                     |     |                                                        |                                     |     |                     |     |                                                        |                                    |     |                     |     |                                                       |                                        |     |                     |     |                                                      |                                         |     |                     |     |                                                       |                                          |     |                     |     |                                                        |                                       |     |                     |     |                                                       |                          |     |                    |     |                                                       |                          |     |                     |     |                                                       |                                |     |                     |     |                                                       |                                  |     |                     |     |                                                      |                             |     |                     |     |                                                       |                               |     |                     |     |                                                       |
| <i>Tricodesmium ertythraeum</i> IMS101                                                                                                                                                                                                                                                                                                                                                                                                                                                                                                                                                                                                                                                                                                                                                                                                                                                                                                                                                                                                                                                                                                                                                                                                                                                                                                                                                                                                                                                                                                                                                                                                                                                                                                                                                                                                                                                                                                                                                                                                                                                                                                                                                                                                                                                                                                                                                                                                                                                                                                                                                                                                                                                                                                                                                                                                                                                                                                                                                                                                                                                                                                                                                                                                                                                                                                                                                                                                                                                                                                                                                                                                                                                                                            | ... | NSKFRYSRLFAIGLFTLLE                                                                                       | ... | LKKICQSLNVEKLLKIDIDLYLSNLERVAQARSAMEDTLAAMRKKREKR...   |     |     |     |     |                               |     |                    |     |                                                    |                                         |     |                      |     |                                                     |                                         |     |                      |     |                                                     |                                        |     |                     |     |                                                       |                             |     |                     |     |                                                       |                          |     |                     |     |                                                        |                                      |     |                     |     |                                                        |                                     |     |                     |     |                                                        |                                    |     |                     |     |                                                       |                                        |     |                     |     |                                                      |                                         |     |                     |     |                                                       |                                          |     |                     |     |                                                        |                                       |     |                     |     |                                                       |                          |     |                    |     |                                                       |                          |     |                     |     |                                                       |                                |     |                     |     |                                                       |                                  |     |                     |     |                                                      |                             |     |                     |     |                                                       |                               |     |                     |     |                                                       |
| <i>Synechococcus elongatus</i> PCC 7942                                                                                                                                                                                                                                                                                                                                                                                                                                                                                                                                                                                                                                                                                                                                                                                                                                                                                                                                                                                                                                                                                                                                                                                                                                                                                                                                                                                                                                                                                                                                                                                                                                                                                                                                                                                                                                                                                                                                                                                                                                                                                                                                                                                                                                                                                                                                                                                                                                                                                                                                                                                                                                                                                                                                                                                                                                                                                                                                                                                                                                                                                                                                                                                                                                                                                                                                                                                                                                                                                                                                                                                                                                                                                           | ... | RSEFKYSRLFAIGLFSLLE                                                                                       | ... | VTAIAERFHLPSDKLQKDLDLYRSNLEKMEQARITMEEAIQADRKKREQR...  |     |     |     |     |                               |     |                    |     |                                                    |                                         |     |                      |     |                                                     |                                         |     |                      |     |                                                     |                                        |     |                     |     |                                                       |                             |     |                     |     |                                                       |                          |     |                     |     |                                                        |                                      |     |                     |     |                                                        |                                     |     |                     |     |                                                        |                                    |     |                     |     |                                                       |                                        |     |                     |     |                                                      |                                         |     |                     |     |                                                       |                                          |     |                     |     |                                                        |                                       |     |                     |     |                                                       |                          |     |                    |     |                                                       |                          |     |                     |     |                                                       |                                |     |                     |     |                                                       |                                  |     |                     |     |                                                      |                             |     |                     |     |                                                       |                               |     |                     |     |                                                       |
| <i>Thermosynechococcus elongatus</i> BP1                                                                                                                                                                                                                                                                                                                                                                                                                                                                                                                                                                                                                                                                                                                                                                                                                                                                                                                                                                                                                                                                                                                                                                                                                                                                                                                                                                                                                                                                                                                                                                                                                                                                                                                                                                                                                                                                                                                                                                                                                                                                                                                                                                                                                                                                                                                                                                                                                                                                                                                                                                                                                                                                                                                                                                                                                                                                                                                                                                                                                                                                                                                                                                                                                                                                                                                                                                                                                                                                                                                                                                                                                                                                                          | ... | NHTGKYSRLHAVGLYAFLO                                                                                       | ... | LDQLAPVILPLPIEKVKRDLLEYRSNLDKINQARSLMKELVEQERKKRAQQ... |     |     |     |     |                               |     |                    |     |                                                    |                                         |     |                      |     |                                                     |                                         |     |                      |     |                                                     |                                        |     |                     |     |                                                       |                             |     |                     |     |                                                       |                          |     |                     |     |                                                        |                                      |     |                     |     |                                                        |                                     |     |                     |     |                                                        |                                    |     |                     |     |                                                       |                                        |     |                     |     |                                                      |                                         |     |                     |     |                                                       |                                          |     |                     |     |                                                        |                                       |     |                     |     |                                                       |                          |     |                    |     |                                                       |                          |     |                     |     |                                                       |                                |     |                     |     |                                                       |                                  |     |                     |     |                                                      |                             |     |                     |     |                                                       |                               |     |                     |     |                                                       |
| <i>Gloeobacter violaceus</i> PCC 7421                                                                                                                                                                                                                                                                                                                                                                                                                                                                                                                                                                                                                                                                                                                                                                                                                                                                                                                                                                                                                                                                                                                                                                                                                                                                                                                                                                                                                                                                                                                                                                                                                                                                                                                                                                                                                                                                                                                                                                                                                                                                                                                                                                                                                                                                                                                                                                                                                                                                                                                                                                                                                                                                                                                                                                                                                                                                                                                                                                                                                                                                                                                                                                                                                                                                                                                                                                                                                                                                                                                                                                                                                                                                                             | ... | AERFKYSRLFSLGLANILE                                                                                       | ... | LQQICTYKLDYNRVVRDLDFHFSVLERIKRSKEVVDELSQTEERRKREER...  |     |     |     |     |                               |     |                    |     |                                                    |                                         |     |                      |     |                                                     |                                         |     |                      |     |                                                     |                                        |     |                     |     |                                                       |                             |     |                     |     |                                                       |                          |     |                     |     |                                                        |                                      |     |                     |     |                                                        |                                     |     |                     |     |                                                        |                                    |     |                     |     |                                                       |                                        |     |                     |     |                                                      |                                         |     |                     |     |                                                       |                                          |     |                     |     |                                                        |                                       |     |                     |     |                                                       |                          |     |                    |     |                                                       |                          |     |                     |     |                                                       |                                |     |                     |     |                                                       |                                  |     |                     |     |                                                      |                             |     |                     |     |                                                       |                               |     |                     |     |                                                       |
| <i>Solanum tuberosum</i>                                                                                                                                                                                                                                                                                                                                                                                                                                                                                                                                                                                                                                                                                                                                                                                                                                                                                                                                                                                                                                                                                                                                                                                                                                                                                                                                                                                                                                                                                                                                                                                                                                                                                                                                                                                                                                                                                                                                                                                                                                                                                                                                                                                                                                                                                                                                                                                                                                                                                                                                                                                                                                                                                                                                                                                                                                                                                                                                                                                                                                                                                                                                                                                                                                                                                                                                                                                                                                                                                                                                                                                                                                                                                                          | ... | KDGFYSRLFAVGLFRLLE                                                                                        | ... | LEKLCAALNVNKKSVDRDLVDYRNLLSKLVQAKELLKEYVEREKKKRGER...  |     |     |     |     |                               |     |                    |     |                                                    |                                         |     |                      |     |                                                     |                                         |     |                      |     |                                                     |                                        |     |                     |     |                                                       |                             |     |                     |     |                                                       |                          |     |                     |     |                                                        |                                      |     |                     |     |                                                        |                                     |     |                     |     |                                                        |                                    |     |                     |     |                                                       |                                        |     |                     |     |                                                      |                                         |     |                     |     |                                                       |                                          |     |                     |     |                                                        |                                       |     |                     |     |                                                       |                          |     |                    |     |                                                       |                          |     |                     |     |                                                       |                                |     |                     |     |                                                       |                                  |     |                     |     |                                                      |                             |     |                     |     |                                                       |                               |     |                     |     |                                                       |
| <i>Triticum aestivum</i>                                                                                                                                                                                                                                                                                                                                                                                                                                                                                                                                                                                                                                                                                                                                                                                                                                                                                                                                                                                                                                                                                                                                                                                                                                                                                                                                                                                                                                                                                                                                                                                                                                                                                                                                                                                                                                                                                                                                                                                                                                                                                                                                                                                                                                                                                                                                                                                                                                                                                                                                                                                                                                                                                                                                                                                                                                                                                                                                                                                                                                                                                                                                                                                                                                                                                                                                                                                                                                                                                                                                                                                                                                                                                                          | ... | KGNFSYSRFFAVGLFRLLE                                                                                       | ... | LDKLCAALNINKKSVDRDLVDYRNLLSKLVQAKELLKEYVEREKKKREER...  |     |     |     |     |                               |     |                    |     |                                                    |                                         |     |                      |     |                                                     |                                         |     |                      |     |                                                     |                                        |     |                     |     |                                                       |                             |     |                     |     |                                                       |                          |     |                     |     |                                                        |                                      |     |                     |     |                                                        |                                     |     |                     |     |                                                        |                                    |     |                     |     |                                                       |                                        |     |                     |     |                                                      |                                         |     |                     |     |                                                       |                                          |     |                     |     |                                                        |                                       |     |                     |     |                                                       |                          |     |                    |     |                                                       |                          |     |                     |     |                                                       |                                |     |                     |     |                                                       |                                  |     |                     |     |                                                      |                             |     |                     |     |                                                       |                               |     |                     |     |                                                       |
| <i>Oryza sativa</i> (japonica)                                                                                                                                                                                                                                                                                                                                                                                                                                                                                                                                                                                                                                                                                                                                                                                                                                                                                                                                                                                                                                                                                                                                                                                                                                                                                                                                                                                                                                                                                                                                                                                                                                                                                                                                                                                                                                                                                                                                                                                                                                                                                                                                                                                                                                                                                                                                                                                                                                                                                                                                                                                                                                                                                                                                                                                                                                                                                                                                                                                                                                                                                                                                                                                                                                                                                                                                                                                                                                                                                                                                                                                                                                                                                                    | ... | KGSFSYSRFFAVGLFRLLE                                                                                       | ... | LDKLCAALNINKKSVDRDLVDYRNLLSKLVQAKELLKEYVEREKKKREER...  |     |     |     |     |                               |     |                    |     |                                                    |                                         |     |                      |     |                                                     |                                         |     |                      |     |                                                     |                                        |     |                     |     |                                                       |                             |     |                     |     |                                                       |                          |     |                     |     |                                                        |                                      |     |                     |     |                                                        |                                     |     |                     |     |                                                        |                                    |     |                     |     |                                                       |                                        |     |                     |     |                                                      |                                         |     |                     |     |                                                       |                                          |     |                     |     |                                                        |                                       |     |                     |     |                                                       |                          |     |                    |     |                                                       |                          |     |                     |     |                                                       |                                |     |                     |     |                                                       |                                  |     |                     |     |                                                      |                             |     |                     |     |                                                       |                               |     |                     |     |                                                       |
| <i>Chlamydomonas reinhardtii</i>                                                                                                                                                                                                                                                                                                                                                                                                                                                                                                                                                                                                                                                                                                                                                                                                                                                                                                                                                                                                                                                                                                                                                                                                                                                                                                                                                                                                                                                                                                                                                                                                                                                                                                                                                                                                                                                                                                                                                                                                                                                                                                                                                                                                                                                                                                                                                                                                                                                                                                                                                                                                                                                                                                                                                                                                                                                                                                                                                                                                                                                                                                                                                                                                                                                                                                                                                                                                                                                                                                                                                                                                                                                                                                  | ... | AGAFSYNKFVAIGLFRLLE                                                                                       | ... | LEKLVKAVGVKPEAVNRDLMYKGVLSKLAALKELMRFVEREKKKQAEER...   |     |     |     |     |                               |     |                    |     |                                                    |                                         |     |                      |     |                                                     |                                         |     |                      |     |                                                     |                                        |     |                     |     |                                                       |                             |     |                     |     |                                                       |                          |     |                     |     |                                                        |                                      |     |                     |     |                                                        |                                     |     |                     |     |                                                        |                                    |     |                     |     |                                                       |                                        |     |                     |     |                                                      |                                         |     |                     |     |                                                       |                                          |     |                     |     |                                                        |                                       |     |                     |     |                                                       |                          |     |                    |     |                                                       |                          |     |                     |     |                                                       |                                |     |                     |     |                                                       |                                  |     |                     |     |                                                      |                             |     |                     |     |                                                       |                               |     |                     |     |                                                       |
| <i>Arabidopsis thaliana</i>                                                                                                                                                                                                                                                                                                                                                                                                                                                                                                                                                                                                                                                                                                                                                                                                                                                                                                                                                                                                                                                                                                                                                                                                                                                                                                                                                                                                                                                                                                                                                                                                                                                                                                                                                                                                                                                                                                                                                                                                                                                                                                                                                                                                                                                                                                                                                                                                                                                                                                                                                                                                                                                                                                                                                                                                                                                                                                                                                                                                                                                                                                                                                                                                                                                                                                                                                                                                                                                                                                                                                                                                                                                                                                       | ... | KEGFSYSRFFAVGLFRLLE                                                                                       | ... | LDKLCASLNINKKSVDRDLVDYRNLLSKLVQAKELLKEYVEREKKKQGER...  |     |     |     |     |                               |     |                    |     |                                                    |                                         |     |                      |     |                                                     |                                         |     |                      |     |                                                     |                                        |     |                     |     |                                                       |                             |     |                     |     |                                                       |                          |     |                     |     |                                                        |                                      |     |                     |     |                                                        |                                     |     |                     |     |                                                        |                                    |     |                     |     |                                                       |                                        |     |                     |     |                                                      |                                         |     |                     |     |                                                       |                                          |     |                     |     |                                                        |                                       |     |                     |     |                                                       |                          |     |                    |     |                                                       |                          |     |                     |     |                                                       |                                |     |                     |     |                                                       |                                  |     |                     |     |                                                      |                             |     |                     |     |                                                       |                               |     |                     |     |                                                       |
| <i>Chlorella virus</i> PBCV-1                                                                                                                                                                                                                                                                                                                                                                                                                                                                                                                                                                                                                                                                                                                                                                                                                                                                                                                                                                                                                                                                                                                                                                                                                                                                                                                                                                                                                                                                                                                                                                                                                                                                                                                                                                                                                                                                                                                                                                                                                                                                                                                                                                                                                                                                                                                                                                                                                                                                                                                                                                                                                                                                                                                                                                                                                                                                                                                                                                                                                                                                                                                                                                                                                                                                                                                                                                                                                                                                                                                                                                                                                                                                                                     | ... | NDKYVYSSFAAVGIFKLLQ                                                                                       | ... | VKHLSESIGFKGBLVHKDIATFFSLLKYIESSQKLADDIREESLKRKSKS...  |     |     |     |     |                               |     |                    |     |                                                    |                                         |     |                      |     |                                                     |                                         |     |                      |     |                                                     |                                        |     |                     |     |                                                       |                             |     |                     |     |                                                       |                          |     |                     |     |                                                        |                                      |     |                     |     |                                                        |                                     |     |                     |     |                                                        |                                    |     |                     |     |                                                       |                                        |     |                     |     |                                                      |                                         |     |                     |     |                                                       |                                          |     |                     |     |                                                        |                                       |     |                     |     |                                                       |                          |     |                    |     |                                                       |                          |     |                     |     |                                                       |                                |     |                     |     |                                                       |                                  |     |                     |     |                                                      |                             |     |                     |     |                                                       |                               |     |                     |     |                                                       |

WU-BLAST was used to identify proteins homologous to Psb29. The proteins identified in the analysis all had E-values <math>10^{-14}</math>. Protein sequences were aligned using CLUSTAL-W, followed by manual alignment. Three well conserved blocks were identified and used for tree building, consisting of a total of 165 columns. Columns are numbered according to the *Synechocystis* 6803 protein sequence.
